# Supplementary material
Source: publisher site journal article supplement (https://www.dovepress.com/article/282611)
Supplement: Supplementary file 1 [file get_supplementary_file.php]

Supplementary Materials

Documentation of search strategies

University Library search consultation group

Date: September 9, 2021

Topic/research question: What forms of physical activity are used to manage juvenile rheumatic diseases? Are there differences in levels and types of physical activity recommended based on the types of juvenile rheumatic diseases?

Name of researcher(s): Johan von Heideken and Maura Iversen

Librarian(s): Jonas Pettersson and Sabina Gillsund

Databases:

1. (Ovid) Medline
2. Embase
3. Cochrane Library
4. CINAHL

Total number of hits:

- Before deduplication: 766
- After deduplication: 555

Comments: Please see Figure 1 in manuscript

Figure S1. Medline

| Interface: Ovid MEDLINE(R) and Epub Ahead of Print, In-Process & Other Non-Indexed Citations and Daily  Date of Search: 9 September, 2021  Number of hits: 82  Comment: In Ovid, two or more words are automatically searched as phrases; i.e. no quotation marks are needed | Field labels   - exp/ = exploded MeSH term - / = non exploded MeSH term - .ti,ab,kf. = title, abstract and author keywords - adjx = within x words, regardless of order - * = truncation of word for alternate endings |
| --- | --- |
| Database(s): **Ovid MEDLINE(R) and Epub Ahead of Print, In-Process, In-Data-Review & Other Non-Indexed Citations and Daily**1946 to September 01, 2021 Search Strategy:   | **#** | **Searches** | **Results** | | --- | --- | --- | | 1 | exp Exercise/ or Exercise Test/ or exp Exercise Movement Techniques/ or Fitness Centers/ or Gardening/ or Mobility Limitation/ or exp Muscle Strength/ or exp Physical Endurance/ or Physical Exertion/ or exp Physical Fitness/ or exp "Physical Education and Training"/ or Postural Balance/ or Recreation/ or Sedentary Lifestyle/ or exp Sports/ | 462892 | | 2 | (leisure or energy metabolism or energy expenditure or aerobic or aqua therap* or bicycle* or bicycling or cycling or calisthenic* or callisthenic* or cardiopulmonary conditioning or climbing or danc* or exercise* or endurance or excertion or fitness or gardening or gi gong or gigong or gymnastic* or grip strength* or hand grip* or hiit or hopping or hydrotherap* or isometric training or jogging or jumping or kinesi* or musc* strength* or motion therap* or movement therap* or multidisciplinary rehabilitation or pilates or physical condition or physical function* or physical therap* or physiotherap* or plyometric* or postural balance or relaxation* or running or sedentary or sport* or stretching or swim* or t'ai chi or tai or thai or taiji or taijiquan or taichi or treadmill or walk* or warm-up or weight* lifting or lifting weight* or weightlifting or power lifting or weight training or yoga).ti,ab,kf. | 1151472 | | 3 | (physical* adj2 (activ* or capacity or education or effort* or inactiv* or mobility or training)).ti,ab,kf. | 156864 | | 4 | ((anaerobic or cardio* or circuit or interval* or muscle* or multidisciplinary or resistance* or strength*) adj3 (program* or rehabilitation* or training)).ti,ab,kf. | 45207 | | 5 | 1 or 2 or 3 or 4 | 1371773 | | 6 | exp Child/ or exp Infant/ or exp Adolescent/ or exp Pediatrics/ | 3745025 | | 7 | (adolescen* or boy? or child* or girl? or highschool* or juvenil* or kid? or kindergar* or minor? or paediatric* or peadiatric* or pediatric* or prepuber* or prepubescen* or preschool* or puber* or pubescen* or school* or teen* or under-age? or underage? or young* patient* or youth*).ti,ab,kf. | 2510005 | | 8 | 6 or 7 | 4657566 | | 9 | exp Arthritis, Juvenile/ | 10818 | | 10 | ((juvenile adj2 arthriti*) or (juvenile adj2 still* disease) or (juvenile adj2 oligoarthriti*) or (juvenile adj2 polyarthriti*)).ab,kf,ti. | 11038 | | 11 | 9 or 10 | 13924 | | 12 | randomized controlled trial.pt. | 542349 | | 13 | controlled clinical trial.pt. | 94363 | | 14 | randomized.ab. | 532330 | | 15 | placebo.ab. | 221045 | | 16 | clinical trials as topic.sh. | 197160 | | 17 | randomly.ab. | 364980 | | 18 | trial.ti. | 246685 | | 19 | 12 or 13 or 14 or 15 or 16 or 17 or 18 | 1390931 | | 20 | 5 and 8 and 11 and 19 | 82 | | |

Figure S2. Embase

| Interface: embase.com  Date of Search: 9 September 2021  Number of hits: 406  Comment: Emtree is the controlled vocabulary in Embase | Field labels   - /exp = exploded Emtree term - /de = non exploded Emtree term - ti,ab,kw = title, abstract and author keywords - NEAR/x = within x words, regardless of order - * = truncation of word for alternate endings |
| --- | --- |
| **Results**  **406**  **#43**  **#5** AND **#19** AND **#22** AND **#42**  **5,522,925**  **#42**  **#23** OR **#24** OR **#25** OR **#26** OR **#27** OR **#28** OR **#29** OR **#30** OR **#31** OR **#32** OR **#33** OR **#34** OR **#35** OR **#36** OR **#37** OR **#38** OR **#39** OR **#40** OR **#41**  **343,705**  **#41**  **trial**:ti  **1,202,823**  **#40**  **human** AND **'experiment'**/exp  **261,810**  **#39**  **volunteer**:ti,ab OR **volunteers**:ti,ab  **0**  **#38**  **controlled**:ti,ab AND **adj7**:ti,ab AND (**study**:ti,ab OR **design**:ti,ab OR **trial**:ti,ab)  **426,165**  **#37**  **assigned**:ti,ab OR **allocated**:ti,ab  **0**  **#36**  (assign$:ti,ab OR **match**:ti,ab OR **matched**:ti,ab OR **allocation**:ti,ab) AND **adj5**:ti,ab AND (**alternate**:ti,ab OR group$1:ti,ab OR intervention$1:ti,ab OR patient$1:ti,ab OR subject$1:ti,ab OR participant$1:ti,ab)  **112,629**  **#35**  **crossover**:ti,ab OR **'cross over'**:ti,ab  **0**  **#34**  'parallel group$1':ti,ab  **187,780**  **#33**  **'double blind procedure'**/exp  **54**  **#32**  (**double**:ti,ab OR **single**:ti,ab OR **doubly**:ti,ab OR **singly**:ti,ab) AND **adj**:ti,ab AND (**blind**:ti,ab OR **blinded**:ti,ab OR **blindly**:ti,ab)  **90,138**  **#31**  (**open** NEAR/1 **label**):ti,ab  **2,356,881**  **#30**  (**evaluated**:ab OR **evaluate**:ab OR **evaluating**:ab OR **assessed**:ab OR **assess**:ab) AND (**compare**:ab OR **compared**:ab OR **comparing**:ab OR **comparison**:ab)  **568,065**  **#29**  **compare**:ti OR **compared**:ti OR **comparison**:ti  **329,158**  **#28**  **placebo**:ti,ab  **276,563**  **#27**  **'intermethod comparison'**/exp  **91,956**  **#26**  **'randomization'**/exp  **363,712**  **#25**  random$:ti,ab  **850,698**  **#24**  **'controlled clinical trial'**/exp  **676,087**  **#23**  **'randomized controlled trial'**/exp  **25,718**  **#22**  **#20** OR **#21**  **18,638**  **#21**  ((**juvenile** NEAR/2 **arthriti***):ti,ab,kw) OR ((**juvenile** NEAR/2 **'still* disease'**):ti,ab,kw) OR ((**juvenile** NEAR/2 **oligoarthriti***):ti,ab,kw) OR ((**juvenile** NEAR/2 **polyarthriti***):ti,ab,kw)  **23,746**  **#20**  **'juvenile rheumatoid arthritis'**/exp  **2,131,889**  **#19**  **#6** OR **#7** OR **#8** OR **#9** OR **#10** OR **#11** OR **#12** OR **#13** OR **#14** OR **#15** OR **#16** OR **#17** OR **#18**  **41,432**  **#18**  ((**anaerobic** OR **cardio*** OR **circuit** OR **interval*** OR **muscle*** OR **resistance*** OR **strength***) NEAR/2 (**program*** OR **training**)):ti,ab,kw  **213,571**  **#17**  (**physical*** NEAR/2 (**activ*** OR **capacity** OR **education** OR **effort*** OR **inactiv*** OR **mobility** OR **training**)):ti,ab,kw  **1,807,456**  **#16**  **aerobic**:ti,ab,kw OR **'aqua therap*'**:ti,ab,kw OR **bicycle***:ti,ab,kw OR **bicycling**:ti,ab,kw OR **cycling**:ti,ab,kw OR **calisthenic***:ti,ab,kw OR **callisthenic***:ti,ab,kw OR **cardio**:ti,ab,kw OR **'cardiopulmonary conditioning'**:ti,ab,kw OR **climbing**:ti,ab,kw OR **danc***:ti,ab,kw OR **exercise***:ti,ab,kw OR **endurance**:ti,ab,kw OR **fitness**:ti,ab,kw OR **'functional therap*'**:ti,ab,kw OR **'gi gong'**:ti,ab,kw OR **gigong**:ti,ab,kw OR **gym?**:ti,ab,kw OR **gymnastic***:ti,ab,kw OR **hiit**:ti,ab,kw OR **hopping**:ti,ab,kw OR **hydrotherap***:ti,ab,kw OR **'isometric training'**:ti,ab,kw OR **jogging**:ti,ab,kw OR **jump***:ti,ab,kw OR **kinesi***:ti,ab,kw OR **locomotion***:ti,ab,kw OR **'musc* strength*'**:ti,ab,kw OR **'muscle training'**:ti,ab,kw OR **'motion therap*'**:ti,ab,kw OR **'movement therap*'**:ti,ab,kw OR **'multidisciplinary rehabilitation'**:ti,ab,kw OR **'occupational therap*'**:ti,ab,kw OR **pilates**:ti,ab,kw OR **'physical condition'**:ti,ab,kw OR **'physical educat*'**:ti,ab,kw OR **'physical function*'**:ti,ab,kw OR **'physical therap*'**:ti,ab,kw OR **physiotherap***:ti,ab,kw OR **plyometric***:ti,ab,kw OR **'power training'**:ti,ab,kw OR **rowing**:ti,ab,kw OR **running**:ti,ab,kw OR **sport***:ti,ab,kw OR **strength***:ti,ab,kw OR **stretch***:ti,ab,kw OR **swim***:ti,ab,kw OR **'tai chi'**:ti,ab,kw OR **tai**:ti,ab,kw OR **thai**:ti,ab,kw OR **taiji**:ti,ab,kw OR **taijiquan**:ti,ab,kw OR **taichi**:ti,ab,kw OR **treadmill**:ti,ab,kw OR **walk***:ti,ab,kw OR **'weight* lifting'**:ti,ab,kw OR **'lifting weight*'**:ti,ab,kw OR **weightlifting**:ti,ab,kw OR **'power lifting'**:ti,ab,kw OR **'weight training'**:ti,ab,kw OR **yoga**:ti,ab,kw  **189,893**  **#15**  **'sport'**/exp  **97,203**  **#14**  **'physiotherapy'**/de  **14,183**  **#13**  **'physical education'**/de  **40,766**  **#12**  **'fitness'**/exp  **25,493**  **#11**  **'endurance'**/exp  **78,359**  **#10**  **'muscle strength'**/exp  **102,137**  **#9**  **'exercise test'**/exp  **89,566**  **#8**  **'kinesiotherapy'**/exp  **383,773**  **#7**  **'exercise'**/exp  **5,580**  **#6**  **'dancing'**/de  **5,252,634**  **#5**  **#1** OR **#2** OR **#3** OR **#4**  **757,570**  **#4**  ((**1** OR **2** OR **3** OR **4** OR **5** OR **6** OR **7** OR **8** OR **9** OR **10** OR **11** OR **12** OR **13** OR **14** OR **15** OR **16** OR **17** OR **18**) NEAR/3 **year?** NEAR/3 (**age*** OR **old***)):ti,ab,kw  **2,909,991**  **#3**  **adolescen***:ti,ab,kw OR **boy?**:ti,ab,kw OR **child***:ti,ab,kw OR **girl?**:ti,ab,kw OR **highschool***:ti,ab,kw OR **juvenil***:ti,ab,kw OR **kid?**:ti,ab,kw OR **kindergar***:ti,ab,kw OR **minor?**:ti,ab,kw OR **paediatric***:ti,ab,kw OR **peadiatric***:ti,ab,kw OR **pediatric***:ti,ab,kw OR **prepuber***:ti,ab,kw OR **prepubescen***:ti,ab,kw OR **preschool***:ti,ab,kw OR **puber***:ti,ab,kw OR **pubescen***:ti,ab,kw OR **school***:ti,ab,kw OR **teen***:ti,ab,kw OR **'under age?'**:ti,ab,kw OR **underage?**:ti,ab,kw OR **'young* patient*'**:ti,ab,kw OR **youth***:ti,ab,kw  **1,762,421**  **#2**  **'adolescent'**/de  **3,069,178**  **#1**  **'child'**/exp | |

Figure S3. Cochrane Library

| Interface: Wiley  Date of Search: 9 september  Number of hits: 212 | Field labels   - ti,ab,kw = title, abstract and author keywords - NEAR/x = within x words, regardless of order - * = truncation of word for alternate endings |
| --- | --- |
| ID Search Hits  #1 MeSH descriptor: [Exercise] explode all trees 26442  #2 MeSH descriptor: [Exercise Test] this term only 8516  #3 MeSH descriptor: [Exercise Movement Techniques] explode all trees 2307  #4 MeSH descriptor: [Fitness Centers] this term only 42  #5 MeSH descriptor: [Gardening] explode all trees 36  #6 MeSH descriptor: [Mobility Limitation] this term only 520  #7 MeSH descriptor: [Muscle Strength] explode all trees 6160  #8 MeSH descriptor: [Physical Endurance] explode all trees 6233  #9 MeSH descriptor: [Physical Exertion] this term only 3925  #10 MeSH descriptor: [Physical Fitness] explode all trees 3538  #11 MeSH descriptor: [Physical Education and Training] explode all trees 1621  #12 MeSH descriptor: [Postural Balance] this term only 2935  #13 MeSH descriptor: [Recreation] this term only 149  #14 MeSH descriptor: [Sedentary Behavior] this term only 1226  #15 MeSH descriptor: [Sports] explode all trees 16385  #16 #1 OR #2 OR #3 OR #4 OR #5 OR #6 OR #7 OR #8 OR #9 OR #10 OR #11 OR #12 OR #13 OR #14 OR #15 45253  #17 ((leisure or energy metabolism or energy expenditure or aerobic or aqua therap* or bicycle* or bicycling or cycling or calisthenic* or callisthenic* or cardiopulmonary conditioning or climbing or danc* or exercise* or endurance or excertion or fitness or gardening or gi gong or gigong or gymnastic* or grip strength* or hand grip* or hiit or hopping or hydrotherap* or isometric training or jogging or jumping or kinesi* or musc* strength* or motion therap* or movement therap* or multidisciplinary rehabilitation or pilates or physical condition or physical function* or physical therap* or physiotherap* or plyometric* or postural balance or relaxation* or running or sedentary or sport* or stretching or swim* or t'ai chi or tai or thai or taiji or taijiquan or taichi or treadmill or walk* or warm-up or weight* lifting or lifting weight* or weightlifting or power lifting or weight training or yoga)):ti,ab,kw (Word variations have been searched) 328448  #18 ((physical* NEAR/2 (activ* or capacity or education or effort* or inactiv* or mobility or training))):ti,ab,kw (Word variations have been searched) 42973  #19 (((anaerobic or cardio* or circuit or interval* or muscle* or multidisciplinary or resistance* or strength*) NEAR/3 (program* or rehabilitation* or training))):ti,ab,kw (Word variations have been searched) 26755  #20 #17 OR #18 OR #19 336243  #21 #16 OR #20 336923  #22 MeSH descriptor: [Child] explode all trees 58448  #23 MeSH descriptor: [Infant] explode all trees 33346  #24 MeSH descriptor: [Adolescent] explode all trees 106993  #25 MeSH descriptor: [Pediatrics] explode all trees 707  #26 ((adolescen* or boy? or child* or girl? or highschool* or juvenil* or kid? or kindergar* or minor? or paediatric* or peadiatric* or pediatric* or prepuber* or prepubescen* or preschool* or puber* or pubescen* or school* or teen* or under-age? or underage? or young* patient* or youth*)):ti,ab,kw (Word variations have been searched) 331174  #27 #22 OR #23 OR #24 OR #25 OR #26 342347  #28 MeSH descriptor: [Arthritis, Juvenile] explode all trees 310  #29 (((juvenile NEAR/2 arthriti*) or (juvenile NEAR/2 still* disease) or (juvenile NEAR/2 oligoarthriti*) or (juvenile NEAR/2 polyarthriti*))):ti,ab,kw (Word variations have been searched) 923  #30 #28 OR #29 923  #31 #21 AND #27 AND #30 219 | |
| #32 Restricting to only trials 212 | |

Figure S4. Cinahl

| Interface: Ebsco  Date of Search: 9 September 2021  Number of hits: 66 | Field labels   - MH+ = exploded Cinahl Heading - MH = non exploded Cinahl Heading - TI = title - AB = abstract - Nx = within x words, regardless of order - * = truncation of word for alternate endings |
| --- | --- |
| | **#** | **Query** | **Limiters/Expanders** | **Last Run Via** | **Results** | | --- | --- | --- | --- | --- | | S49 | S21 AND S28 AND S32 AND S48 | Expanders - Apply equivalent subjects Search modes - Find all my search terms | Interface - EBSCOhost Research Databases Search Screen - Advanced Search Database - CINAHL | 66 | | S48 | S33 OR S34 OR S35 OR S36 OR S37 OR S38 OR S39 OR S40 OR S41 OR S42 OR S43 OR S44 OR S45 OR S46 OR S47 | Expanders - Apply equivalent subjects Search modes - Find all my search terms | Interface - EBSCOhost Research Databases Search Screen - Advanced Search Database - CINAHL | 882,064 | | S47 | AB (CLUSTER W3 RCT) | Expanders - Apply equivalent subjects Search modes - Find all my search terms | Interface - EBSCOhost Research Databases Search Screen - Advanced Search Database - CINAHL | 394 | | S46 | MH (CROSSOVER DESIGN) OR MH (COMPARATIVE STUDIES) | Expanders - Apply equivalent subjects Search modes - Find all my search terms | Interface - EBSCOhost Research Databases Search Screen - Advanced Search Database - CINAHL | 404,838 | | S45 | AB (CONTROL W5 GROUP) | Expanders - Apply equivalent subjects Search modes - Find all my search terms | Interface - EBSCOhost Research Databases Search Screen - Advanced Search Database - CINAHL | 123,546 | | S44 | PT (randomized controlled trial) | Expanders - Apply equivalent subjects Search modes - Find all my search terms | Interface - EBSCOhost Research Databases Search Screen - Advanced Search Database - CINAHL | 132,526 | | S43 | MH (placebos) | Expanders - Apply equivalent subjects Search modes - Find all my search terms | Interface - EBSCOhost Research Databases Search Screen - Advanced Search Database - CINAHL | 12,986 | | S42 | MH (sample size) AND AB (assigned OR allocated OR control) | Expanders - Apply equivalent subjects Search modes - Find all my search terms | Interface - EBSCOhost Research Databases Search Screen - Advanced Search Database - CINAHL | 4,181 | | S41 | TI (trial) | Expanders - Apply equivalent subjects Search modes - Find all my search terms | Interface - EBSCOhost Research Databases Search Screen - Advanced Search Database - CINAHL | 153,608 | | S40 | AB (random*) | Expanders - Apply equivalent subjects Search modes - Find all my search terms | Interface - EBSCOhost Research Databases Search Screen - Advanced Search Database - CINAHL | 345,955 | | S39 | TI (randomised OR randomized) | Expanders - Apply equivalent subjects Search modes - Find all my search terms | Interface - EBSCOhost Research Databases Search Screen - Advanced Search Database - CINAHL | 118,861 | | S38 | (MH "Cluster Sample") | Expanders - Apply equivalent subjects Search modes - Find all my search terms | Interface - EBSCOhost Research Databases Search Screen - Advanced Search Database - CINAHL | 4,799 | | S37 | (MH "Pretest-Posttest Design") | Expanders - Apply equivalent subjects Search modes - Find all my search terms | Interface - EBSCOhost Research Databases Search Screen - Advanced Search Database - CINAHL | 47,066 | | S36 | (MH "Random Assignment") | Expanders - Apply equivalent subjects Search modes - Find all my search terms | Interface - EBSCOhost Research Databases Search Screen - Advanced Search Database - CINAHL | 69,639 | | S35 | (MH "Single-Blind Studies") | Expanders - Apply equivalent subjects Search modes - Find all my search terms | Interface - EBSCOhost Research Databases Search Screen - Advanced Search Database - CINAHL | 15,068 | | S34 | (MH "Double-Blind Studies") | Expanders - Apply equivalent subjects Search modes - Find all my search terms | Interface - EBSCOhost Research Databases Search Screen - Advanced Search Database - CINAHL | 51,126 | | S33 | (MH "Randomized Controlled Trials") | Expanders - Apply equivalent subjects Search modes - Find all my search terms | Interface - EBSCOhost Research Databases Search Screen - Advanced Search Database - CINAHL | 119,050 | | S32 | S29 OR S30 OR S31 | Expanders - Apply equivalent subjects Search modes - Find all my search terms | Interface - EBSCOhost Research Databases Search Screen - Advanced Search Database - CINAHL | 3,959 | | S31 | AB ((juvenile N2 arthriti*) or (juvenile N2 still* disease) or (juvenile N2 oligoarthriti*) or (juvenile N2 polyarthriti*)) | Expanders - Apply equivalent subjects Search modes - Find all my search terms | Interface - EBSCOhost Research Databases Search Screen - Advanced Search Database - CINAHL | 2,176 | | S30 | TI ((juvenile N2 arthriti*) or (juvenile N2 still* disease) or (juvenile N2 oligoarthriti*) or (juvenile N2 polyarthriti*)) | Expanders - Apply equivalent subjects Search modes - Find all my search terms | Interface - EBSCOhost Research Databases Search Screen - Advanced Search Database - CINAHL | 2,201 | | S29 | (MH "Arthritis, Juvenile Rheumatoid") | Expanders - Apply equivalent subjects Search modes - Find all my search terms | Interface - EBSCOhost Research Databases Search Screen - Advanced Search Database - CINAHL | 3,255 | | S28 | S22 OR S23 OR S24 OR S25 OR S26 OR S27 | Expanders - Apply equivalent subjects Search modes - Find all my search terms | Interface - EBSCOhost Research Databases Search Screen - Advanced Search Database - CINAHL | 1,453,400 | | S27 | AB (adolescen* or boy* or child* or girl* or highschool* or juvenil* or kid* or kindergar* or minor* or paediatric* or peadiatric* or pediatric* or prepuber* or prepubescen* or preschool* or puber* or pubescen* or school* or teen* or "under-age*" or underage* or young* patient* or youth*) | Expanders - Apply equivalent subjects Search modes - Find all my search terms | Interface - EBSCOhost Research Databases Search Screen - Advanced Search Database - CINAHL | 741,507 | | S26 | TI (adolescen* or boy* or child* or girl* or highschool* or juvenil* or kid* or kindergar* or minor* or paediatric* or peadiatric* or pediatric* or prepuber* or prepubescen* or preschool* or puber* or pubescen* or school* or teen* or "under-age*" or underage* or young* patient* or youth*) | Expanders - Apply equivalent subjects Search modes - Find all my search terms | Interface - EBSCOhost Research Databases Search Screen - Advanced Search Database - CINAHL | 594,992 | | S25 | (MH "Pediatrics+") | Expanders - Apply equivalent subjects Search modes - Find all my search terms | Interface - EBSCOhost Research Databases Search Screen - Advanced Search Database - CINAHL | 21,865 | | S24 | (MH "Adolescence+") | Expanders - Apply equivalent subjects Search modes - Find all my search terms | Interface - EBSCOhost Research Databases Search Screen - Advanced Search Database - CINAHL | 555,458 | | S23 | (MH "Infant+") | Expanders - Apply equivalent subjects Search modes - Find all my search terms | Interface - EBSCOhost Research Databases Search Screen - Advanced Search Database - CINAHL | 267,912 | | S22 | (MH "Child+") | Expanders - Apply equivalent subjects Search modes - Find all my search terms | Interface - EBSCOhost Research Databases Search Screen - Advanced Search Database - CINAHL | 699,417 | | S21 | S1 OR S2 OR S3 OR S4 OR S5 OR S6 OR S7 OR S8 OR S9 OR S10 OR S11 OR S12 OR S13 OR S14 OR S15 OR S16 OR S17 OR S18 OR S19 OR S20 | Expanders - Apply equivalent subjects Search modes - Find all my search terms | Interface - EBSCOhost Research Databases Search Screen - Advanced Search Database - CINAHL | 507,700 | | S20 | AB ((anaerobic or cardio* or circuit or interval* or muscle* or multidisciplinary or resistance* or strength*) N3 (program* or rehabilitation* or training)) | Expanders - Apply equivalent subjects Search modes - Find all my search terms | Interface - EBSCOhost Research Databases Search Screen - Advanced Search Database - CINAHL | 20,974 | | S19 | TI ((anaerobic or cardio* or circuit or interval* or muscle* or multidisciplinary or resistance* or strength*) N3 (program* or rehabilitation* or training)) | Expanders - Apply equivalent subjects Search modes - Find all my search terms | Interface - EBSCOhost Research Databases Search Screen - Advanced Search Database - CINAHL | 10,645 | | S18 | AB (physical* N2 (activ* or capacity or education or effort* or inactiv* or mobility or training)) | Expanders - Apply equivalent subjects Search modes - Find all my search terms | Interface - EBSCOhost Research Databases Search Screen - Advanced Search Database - CINAHL | 69,740 | | S17 | TI (physical* N2 (activ* or capacity or education or effort* or inactiv* or mobility or training)) | Expanders - Apply equivalent subjects Search modes - Find all my search terms | Interface - EBSCOhost Research Databases Search Screen - Advanced Search Database - CINAHL | 32,944 | | S16 | AB (leisure or "energy metabolism" or "energy expenditure" or aerobic or "aqua therap*" or bicycle* or bicycling or cycling or calisthenic* or callisthenic* or "cardiopulmonary conditioning" or climbing or danc* or exercise* or endurance or excertion or fitness or gardening or "gi gong" or gigong or gymnastic* or "grip strength*" or "hand grip*" or hiit or hopping or hydrotherap* or "isometric training" or jogging or jumping or kinesi* or "musc* strength*" or "motion therap*" or "movement therap*" or "multidisciplinary rehabilitation" or pilates or "physical condition*" or "physical function*" or "physical therap*" or physiotherap* or plyometric* or "postural balance" or relaxation* or running or sedentary or sport* or stretching or swim* or "t'ai chi" or tai or thai or taiji or taijiquan or taichi or treadmill or walk* or warm-up or weight* lifting or lifting weight* or weightlifting or "power lifting" or "weight training" or yoga) | Expanders - Apply equivalent subjects Search modes - Find all my search terms | Interface - EBSCOhost Research Databases Search Screen - Advanced Search Database - CINAHL | 288,519 | | S15 | TI (leisure or "energy metabolism" or "energy expenditure" or aerobic or "aqua therap*" or bicycle* or bicycling or cycling or calisthenic* or callisthenic* or "cardiopulmonary conditioning" or climbing or danc* or exercise* or endurance or excertion or fitness or gardening or "gi gong" or gigong or gymnastic* or "grip strength*" or "hand grip*" or hiit or hopping or hydrotherap* or "isometric training" or jogging or jumping or kinesi* or "musc* strength*" or "motion therap*" or "movement therap*" or "multidisciplinary rehabilitation" or pilates or "physical condition*" or "physical function*" or "physical therap*" or physiotherap* or plyometric* or "postural balance" or relaxation* or running or sedentary or sport* or stretching or swim* or "t'ai chi" or tai or thai or taiji or taijiquan or taichi or treadmill or walk* or warm-up or weight* lifting or lifting weight* or weightlifting or "power lifting" or "weight training" or yoga) | Expanders - Apply equivalent subjects Search modes - Find all my search terms | Interface - EBSCOhost Research Databases Search Screen - Advanced Search Database - CINAHL | 168,730 | | S14 | (MH "Sports+") | Expanders - Apply equivalent subjects Search modes - Find all my search terms | Interface - EBSCOhost Research Databases Search Screen - Advanced Search Database - CINAHL | 85,441 | | S13 | (MH "Life Style, Sedentary") | Expanders - Apply equivalent subjects Search modes - Find all my search terms | Interface - EBSCOhost Research Databases Search Screen - Advanced Search Database - CINAHL | 8,711 | | S12 | (MH "Recreation") | Expanders - Apply equivalent subjects Search modes - Find all my search terms | Interface - EBSCOhost Research Databases Search Screen - Advanced Search Database - CINAHL | 4,407 | | S11 | (MH "Balance, Postural") | Expanders - Apply equivalent subjects Search modes - Find all my search terms | Interface - EBSCOhost Research Databases Search Screen - Advanced Search Database - CINAHL | 17,484 | | S10 | (MH "Physical Education and Training+") | Expanders - Apply equivalent subjects Search modes - Find all my search terms | Interface - EBSCOhost Research Databases Search Screen - Advanced Search Database - CINAHL | 4,256 | | S9 | (MH "Exertion") | Expanders - Apply equivalent subjects Search modes - Find all my search terms | Interface - EBSCOhost Research Databases Search Screen - Advanced Search Database - CINAHL | 7,464 | | S8 | (MH "Physical Fitness+") | Expanders - Apply equivalent subjects Search modes - Find all my search terms | Interface - EBSCOhost Research Databases Search Screen - Advanced Search Database - CINAHL | 19,468 | | S7 | (MH "Physical Endurance+") | Expanders - Apply equivalent subjects Search modes - Find all my search terms | Interface - EBSCOhost Research Databases Search Screen - Advanced Search Database - CINAHL | 13,582 | | S6 | (MH "Muscle Strength+") | Expanders - Apply equivalent subjects Search modes - Find all my search terms | Interface - EBSCOhost Research Databases Search Screen - Advanced Search Database - CINAHL | 27,049 | | S5 | (MH "Horticulture") | Expanders - Apply equivalent subjects Search modes - Find all my search terms | Interface - EBSCOhost Research Databases Search Screen - Advanced Search Database - CINAHL | 3,249 | | S4 | (MH "Fitness Centers") | Expanders - Apply equivalent subjects Search modes - Find all my search terms | Interface - EBSCOhost Research Databases Search Screen - Advanced Search Database - CINAHL | 1,787 | | S3 | (MH "Therapeutic Exercise") | Expanders - Apply equivalent subjects Search modes - Find all my search terms | Interface - EBSCOhost Research Databases Search Screen - Advanced Search Database - CINAHL | 24,931 | | S2 | (MH "Exercise Test") | Expanders - Apply equivalent subjects Search modes - Find all my search terms | Interface - EBSCOhost Research Databases Search Screen - Advanced Search Database - CINAHL | 16,211 | | S1 | (MH "Exercise+") | Expanders - Apply equivalent subjects Search modes - Find all my search terms | Interface - EBSCOhost Research Databases Search Screen - Advanced Search Database - CINAHL | 120,921 | | |

**Table S1.** Titles of excluded full text articles including reason for exclusion (n=6)

| Article | Reason for exclusion |
| --- | --- |
| Bearne LM, Thain P, Griffiths A, White C. The effect of interactive digital interventions on physical activity in people with inflammatory arthritis. *Rheumatology (United Kingdom)*. 2017;56:ii97. | Conference abstract of a systematic review |
| Bos J, Armbrust W, Wulffraat N, et al. Internet program for physical activity and exercise-capacity in children with Juvenile Idiopathic Arthritis; A multicenter randomized controlled trial. *Pediatric Rheumatology*. 2017;15. | Conference abstract |
| Sandstedt E, Fasth A, Fors H, Beckung E. Bone health in children and adolescents with juvenile idiopathic arthritis and the influence of short-term physical exercise. *Pediatric physical therapy*. 2012;24(2):155-162. | Wrong study design |
| Stavrakidou M, Trachana M, Koutsonikoli A, Spanidou K, Hristara-Papadopoulou A, Xinias I. The impact of a physiotherapy tele-rehabilitation program on children with juvenile idiopathic arthritis. *Pediatric Rheumatology*. 2018;16. | Conference abstract |
| Tarakci E, Arman N, Tarakci D, Kasapcopur O. Leap Motion Controller–based training for upper extremity rehabilitation in children and adolescents with physical disabilities: A randomized controlled trial. *Journal of Hand Therapy*. 2020;33(2):220-228.e221. | Did not present data separately for different diagnoses |
| Yasar E, Kavlak E, Turkucar S, Bayraktar D, Acari C, Unsal E. Comparing the effects of yoga and home exercise programs on functional status in children with enthesitis related arthritis. *Annals of the Rheumatic Diseases*. 2020;79(SUPPL 1):922. | Conference abstract |
